# Supplementary material
Source: Research Square preprint supplement (doi:10.21203/rs.3.rs-9923709/v1)
Supplement: Supplementary file 1 [file 2ff8406829349595fdb10c5b.docx]

# Supplementary materials

**Table S1**

*Bootstrap comparisons of correlations between alexithymia dimensions and self-reported mental-health indicators*

| Scale | *ρ* DIF | *ρ* DDF | Δ*ρ* | 95% CI |
| --- | --- | --- | --- | --- |
| YSR – Somatic | .558 | .410 | .148 | [.053, .247] |
| PedsQL – Emotional | .694 | .555 | .139 | [.060, .222] |
| SCARED – Panic/Somatic | .583 | .452 | .132 | [.040, .226] |
| YSR – Internalizing | .705 | .589 | .116 | [.040, .197] |
| PedsQL – Physical | .481 | .367 | .114 | [.018, .207] |
| YSR – Externalising | .449 | .340 | .109 | [.024, .195] |
| SCARED – School Avoidance | .491 | .387 | .104 | [.016, .203] |
| YSR – Social | .499 | .427 | .071 | [-.013, .161] |
| PedsQL – School | .435 | .390 | .045 | [-.050, .144] |
| PedsQL – Social | .323 | .310 | .013 | [-.082, .111] |
| SCARED – Social Anxiety | .421 | .467 | -.046 | [-.142, .049] |

*Note.* DIF = difficulties identifying feelings; DDF = difficulties describing feelings; Δρ = difference between Spearman correlations for DIF and DDF. Confidence intervals are 95% bootstrap confidence intervals. Significant differences are indicated by confidence intervals that do not include zero.

**Table S2**

*Standardized factor loadings and latent alexithymia associations in the bifactor-(S−1) model – youth self-report*

| Indicator / association | General distress factor | Thought/detachment residual factor | Externalising residual factor |
| --- | --- | --- | --- |
| Anxiety/depression | .865 [.819, .912] |  |  |
| Generalized anxiety | .817 [.766, .867] |  |  |
| Panic/somatic symptoms | .725 [.652, .798] |  |  |
| Somatic complaints | .675 [.586, .764] |  |  |
| Thought problems | .725 [.651, .798] | .289 [.102, .476] |  |
| Withdrawal/depression | .723 [.647, .798] | .225 [.075, .375] |  |
| Rule-breaking behaviour | .354 [.210, .498] |  | .669 [.562, .776] |
| Aggressive behaviour | .422 [.293, .552] |  | .719 [.598, .841] |
| Alexithymia | .778 [.686, .869] | −.195 [−.569, .179] | .095 [−.056, .246] |

*Note.* Values are standardized estimates with 95% confidence intervals in brackets. The general distress factor was specified as the reference factor in the bifactor-(S−1) model. Residual factors were constrained to be orthogonal to the general distress factor and to each other. The alexithymia row represents latent associations between the alexithymia factor and the psychopathology factors.

**Table S3**

*Standardized factor loadings and latent alexithymia associations in the bifactor-(S−1) model – parent-report*

| Indicator / association | General distress factor | Externalising residual factor |
| --- | --- | --- |
| Anxiety/depression | .855 [.748, .961] |  |
| Generalized anxiety | .655 [.509, .801] |  |
| Panic/somatic symptoms | .568 [.432, .703] |  |
| Somatic complaints | .525 [.345, .704] |  |
| Thought problems | .502 [.323, .682] |  |
| Withdrawal/depression | .802 [.691, .914] |  |
| Rule-breaking behaviour | .276 [.103, .448] | .788 [.631, .945] |
| Aggressive behaviour | .456 [.283, .629] | .694 [.519, .869] |
| Alexithymia | .612 [.471, .753] | −.005 [−.243, .232] |

*Note.* Values are standardized estimates with 95% confidence intervals in brackets. The general distress factor was specified as the reference factor in the parent-report bifactor-(S−1) model. The residual thought/detachment factor was not retained because it was not meaningfully defined after extraction of the general distress factor. The externalising residual factor was constrained to be orthogonal to the general distress factor. The alexithymia row represents latent associations between parent-reported alexithymia and the psychopathology factors.
